# Supplementary material for: Multi-high valence state metal doping in NiFe hydroxide toward superior oxygen evolution reaction activity
Source: Royal Society of Chemistry journal article supplement (doi:10.1039/d2ta07681k), 2023-01-01
Supplement: d2ta07681k1.pdf [file d2ta07681k1.pdf]

## Supporting Information

### **Multi-high valence state metal doping in NiFe hydroxide toward superior oxygen evolution reaction activity**

Fitri Nur Indah Sari<sup>1</sup>, Gally Frenel<sup>1</sup>, Alex Chinghuan Lee<sup>2</sup>, Yan-Jia Huang<sup>1</sup>, Yen-Hsun Su<sup>1</sup>,

Jyh-Ming Ting<sup>1,2\*</sup>

<sup>1</sup>Department of Materials Science and Engineering

<sup>2</sup>Hierarchical Green-Energy Materials (Hi-GEM) Research Center

National Cheng Kung University, Tainan, Taiwan

\*E-mail: [jting@mail.ncku.edu.tw](mailto:jting@mail.ncku.edu.tw)

Table S1. Experimental matrix of hydroxide catalysts. All salt precursors have the same concentration of 0.01M.

| Sample ID | FeCl <sub>3</sub><br>(mL) | VCl <sub>3</sub><br>(mL) | TiCl <sub>3</sub><br>(mL) | Co(NO <sub>3</sub> ) <sub>2</sub> ·6H <sub>2</sub> O<br>(mL) | Cr(NO <sub>3</sub> ) <sub>3</sub> ·9H <sub>2</sub> O<br>(mL) |
|-----------|---------------------------|--------------------------|---------------------------|--------------------------------------------------------------|--------------------------------------------------------------|
| FN        | 40                        |                          |                           |                                                              |                                                              |
| FNV       | 40                        | 20                       |                           |                                                              |                                                              |
| FNVTi     | 40                        | 20                       | 2                         |                                                              |                                                              |
| FNVTiCo   | 40                        | 20                       | 2                         | 2                                                            |                                                              |
| FNVTiCr   | 40                        | 20                       | 2                         |                                                              | 2                                                            |

**Information SI. Determination of Ag/AgCl reference electrode and conversion into reference hydrogen electrode (RHE)**

The calibration of Ag/AgCl reference electrode was performed under linear sweep voltammetry (LSV) at  $0.5 \text{ mV s}^{-1}$  in  $\text{H}_2$ -saturated 1M KOH electrolyte to obtain the thermodynamic potential of the hydrogen electrode reaction.<sup>1,2</sup> The potentials at which the current crosses zero was taken to be the thermodynamic potential for the hydrogen electrode reactions. The zero-current point was determined to be  $-1.01 \text{ V}$ , as shown in Figure SI. Therefore, the  $E_{\text{RHE}} = E_{\text{Ag/AgCl}} + 1.01 \text{ V}$ .

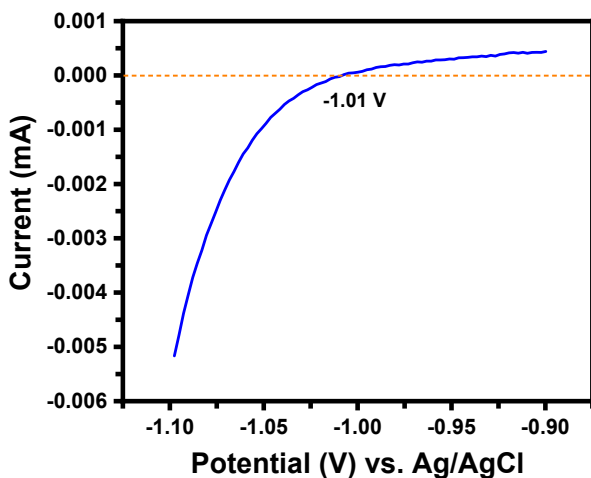

Figure SI. LSV plot of Ag/AgCl reference electrode calibration.

### **Information SII. Preparation of RuO<sub>2</sub> and Pt/C electrodes**

RuO<sub>2</sub> and Pt/C electrodes were prepared using the same approach. A slurry containing 5 mg of as-received RuO<sub>2</sub> (Alfa Aesar, 99.9%) or Pt/C (Alfa Aesar, 20%), 50 μL of Nafion (5wt%), 150 μL of ethanol, and 350 μL of deionized water was first prepared. The slurry was then ultrasonicated for 30 min to obtain a homogeneous dispersion. After that, 150 μL of the slurry was dropped cast onto HCl-treated Ni foam, following by drying at 70°C for 1 h.

### Information SIII Growth process of FNVTiCr hydroxide on Ni foam

FNVTiCr hydroxide was grown on Ni foam substrate using a corrosion reaction method at room temperature,<sup>3,4</sup> as illustrated in Figure SII. The Ni foam acted as both a substrate and the Ni source. First, the Ni foam substrate was immersed into a FeCl<sub>3</sub> solution (0.01M and pH of 2.95). Fe<sup>3+</sup> in the FeCl<sub>3</sub> solution functioned as the Fe source and oxidant for Ni oxidation.<sup>4</sup> The role of the Cl<sup>-</sup> was to oxidize or corrodes the Ni foam too.<sup>3,4</sup> In other words, Ni foam was corroded by both Fe<sup>3+</sup> and Cl<sup>-</sup> to become Ni<sup>2+</sup> (Reaction 1). On the other hand, oxygen reduction occurred to form OH<sup>-</sup> (Reaction 2).<sup>3</sup> The oxygen came from the air or those in the electrolyte. The formed OH<sup>-</sup> then reacted with the Ni<sup>2+</sup> and Fe<sup>3+</sup>, giving FeNi hydroxide grown on the Ni foam surface (Reaction 3). Afterward, VCl<sub>3</sub>, TiCl<sub>3</sub>, and Cr(NO<sub>3</sub>)<sub>3</sub> precursor solutions were then added into the Ni foam-containing FeCl<sub>3</sub> solution. This allowed the V<sup>3+</sup>, Ti<sup>3+</sup>, and Cr<sup>3+</sup> cations to diffuse into FeNi hydroxide, forming multi-metal hydroxide (Reaction 4).

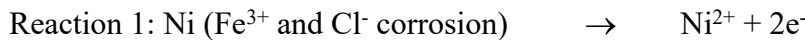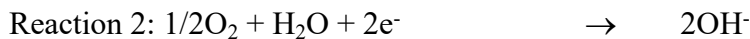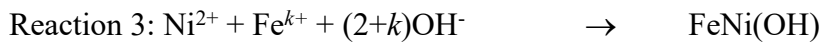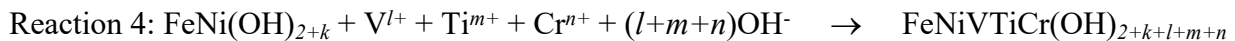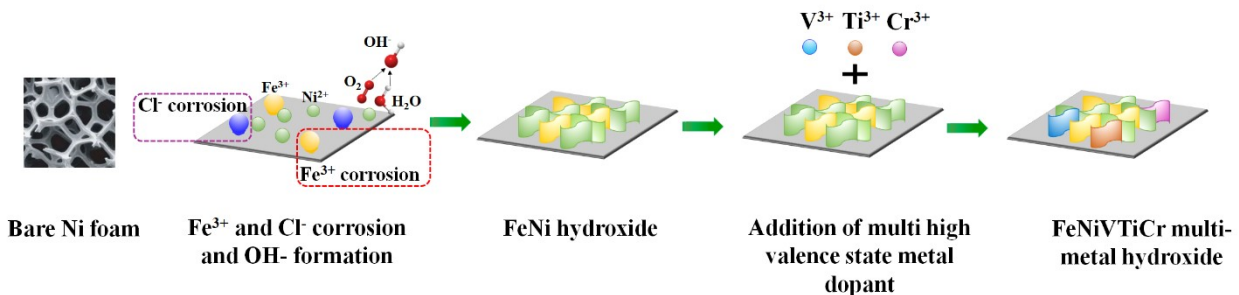

Figure SII. Schematic of the formation of multi-metal hydroxide on Ni foam substrate

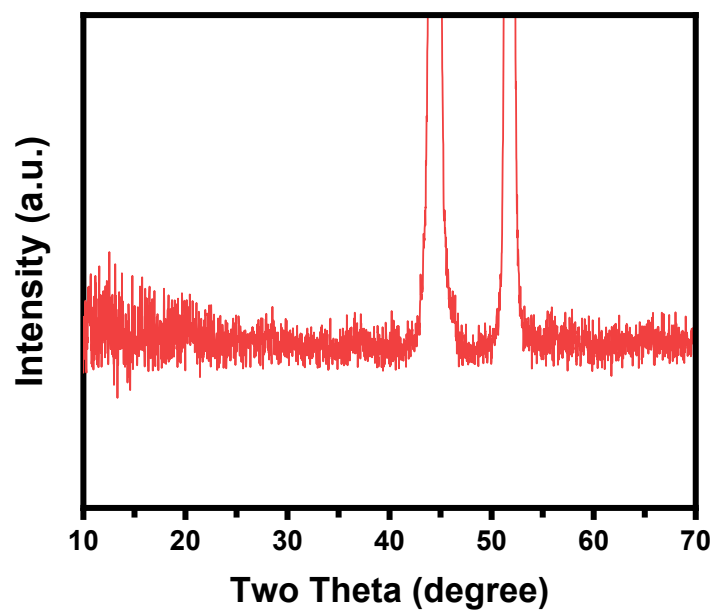

Figure S1. XRD pattern of FNVTiCr.

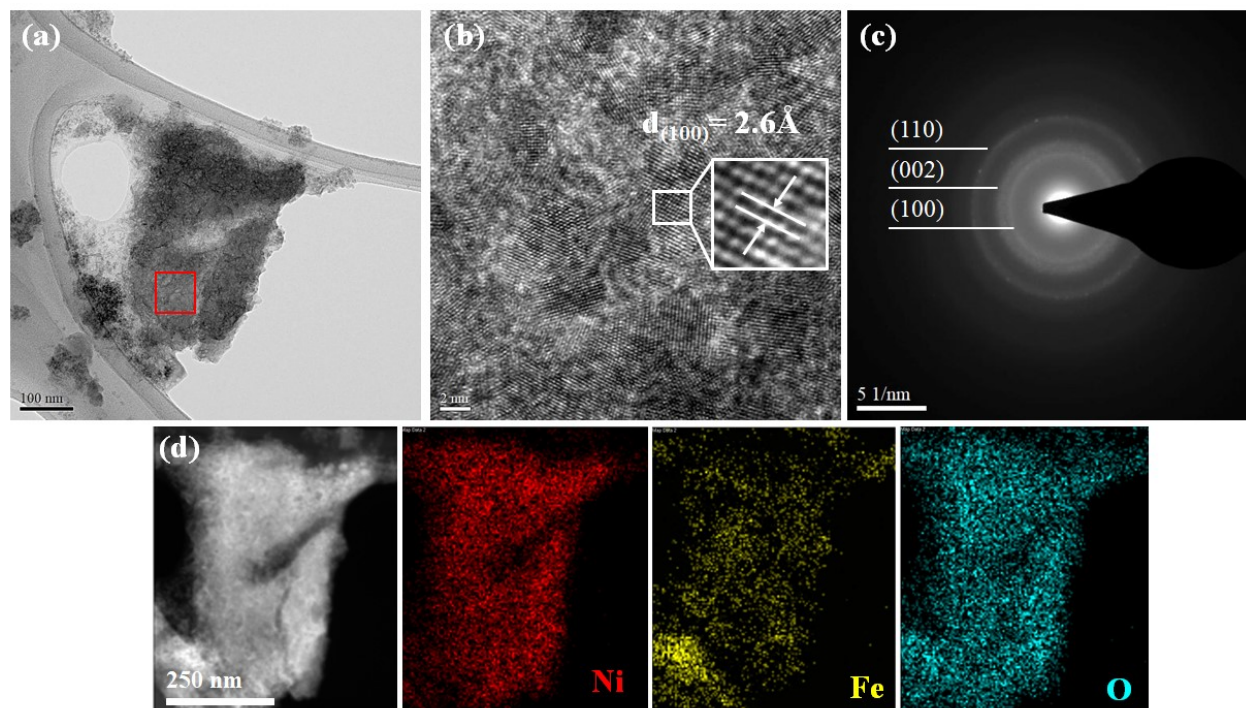

Figure S2. (a) TEM image of FN. (b) HR-TEM and (c) SAED images of the red rectangle in (a). (d) HAADF and STEM-EDS mappings of FN.

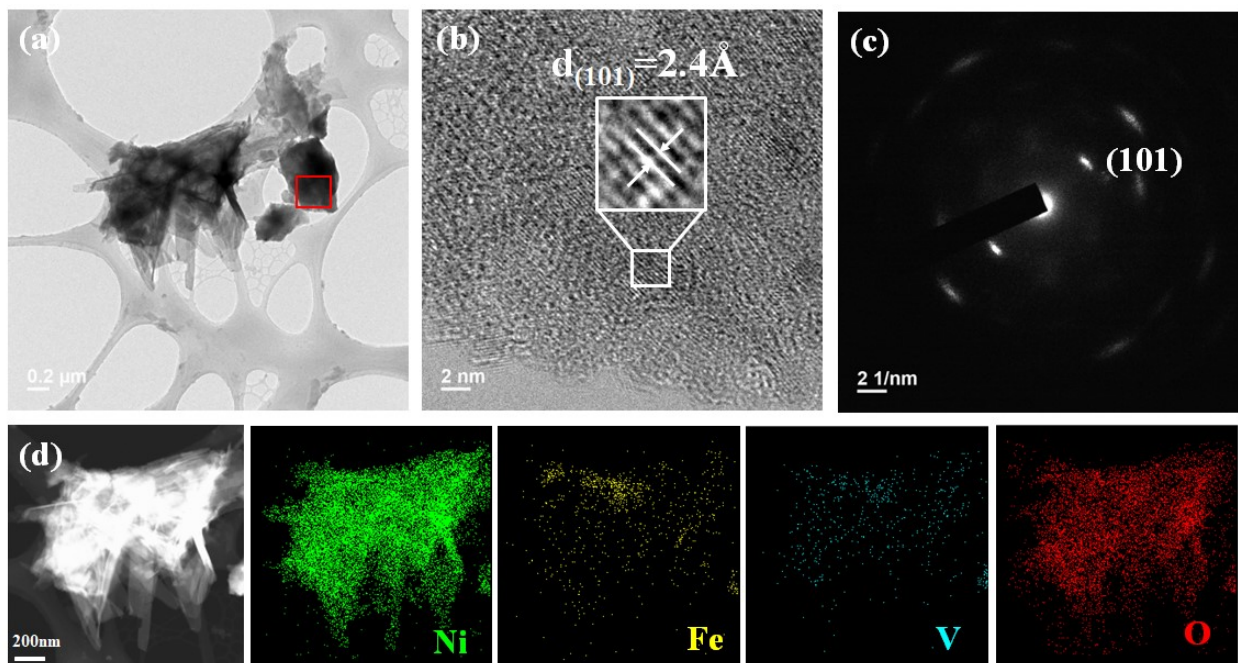

Figure S3. (a) TEM image of FNV. (b) HR-TEM and (c) SAED images of the red rectangle in (a). (d) HAADF and STEM-EDS mappings of FNV.



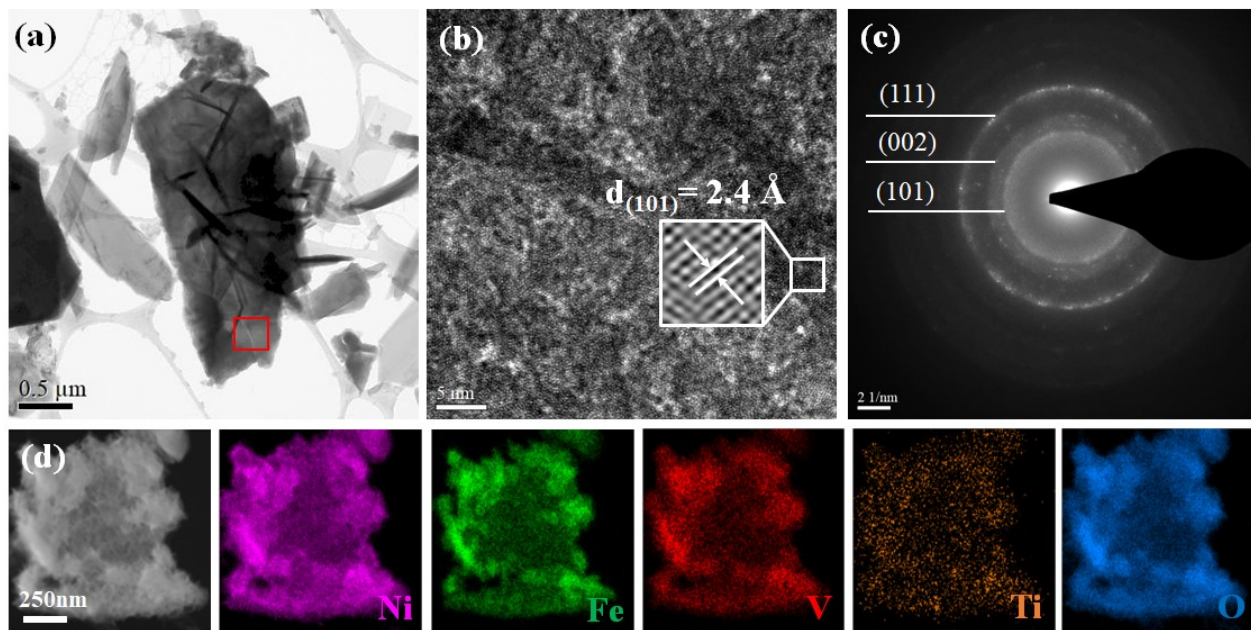

Figure S4. (a) TEM image of FNVTi. (b) HR-TEM and (c) SAED images of the red rectangle in (a). (d) HAADF and STEM-EDS mappings of FNVTi.

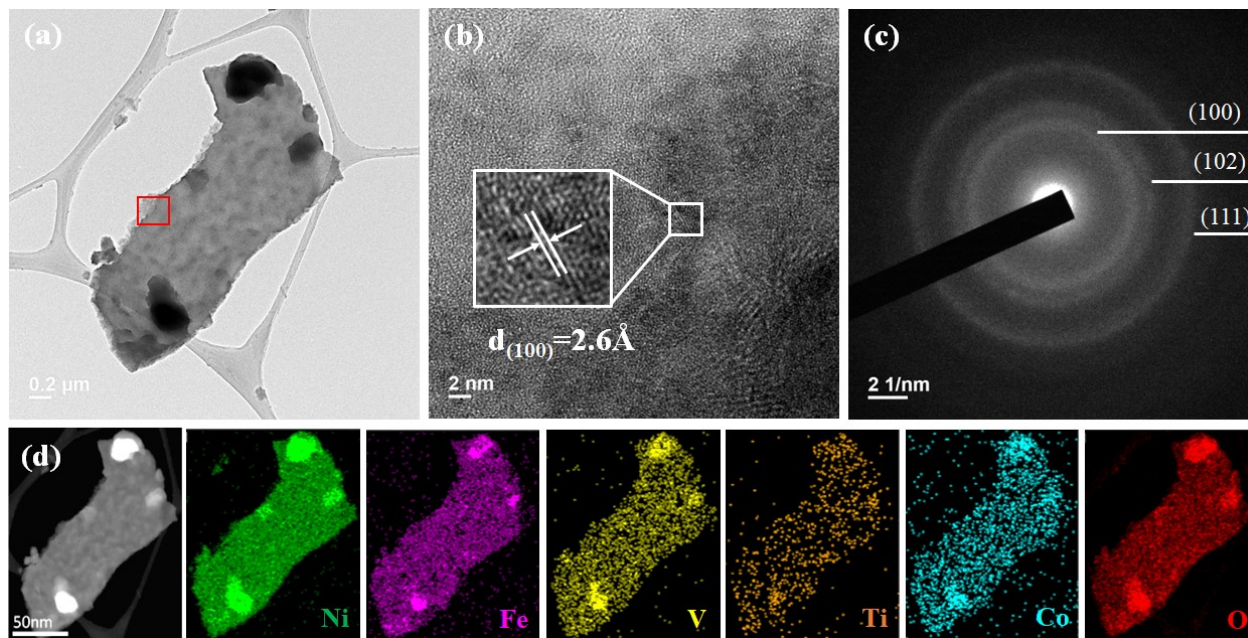

Figure S5. (a) TEM image of FNVTiCo. (b) HR-TEM and (c) SAED images of the red rectangle in (a). (d) HAADF and STEM-EDS mappings of FNVTiCo.

Table S2. Element concentration (at. %) obtained from EDS.

| Sample  | Ni   | Fe   | V   | Ti  | Cr  | Co  |
|---------|------|------|-----|-----|-----|-----|
| FN      | 79.8 | 20.2 |     |     |     |     |
| FNV     | 63.6 | 27.4 | 9.0 |     |     |     |
| FNVTi   | 65.3 | 25.1 | 8.4 | 1.3 |     |     |
| FNVTiCo | 67.2 | 20.7 | 7.5 | 0.9 |     | 3.7 |
| FNVTiCr | 71.5 | 18.8 | 7.9 | 1.2 | 0.6 |     |

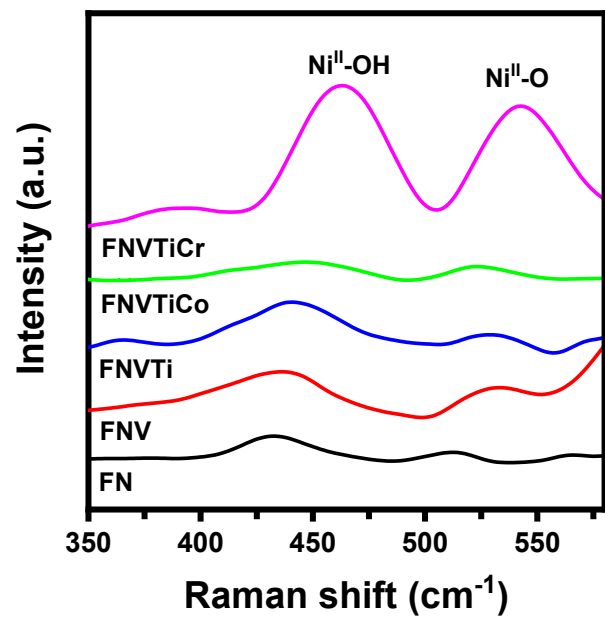

Figure S6. Enlarged Raman spectra of Figure 2e in between 350 and 580  $\text{cm}^{-1}$ .

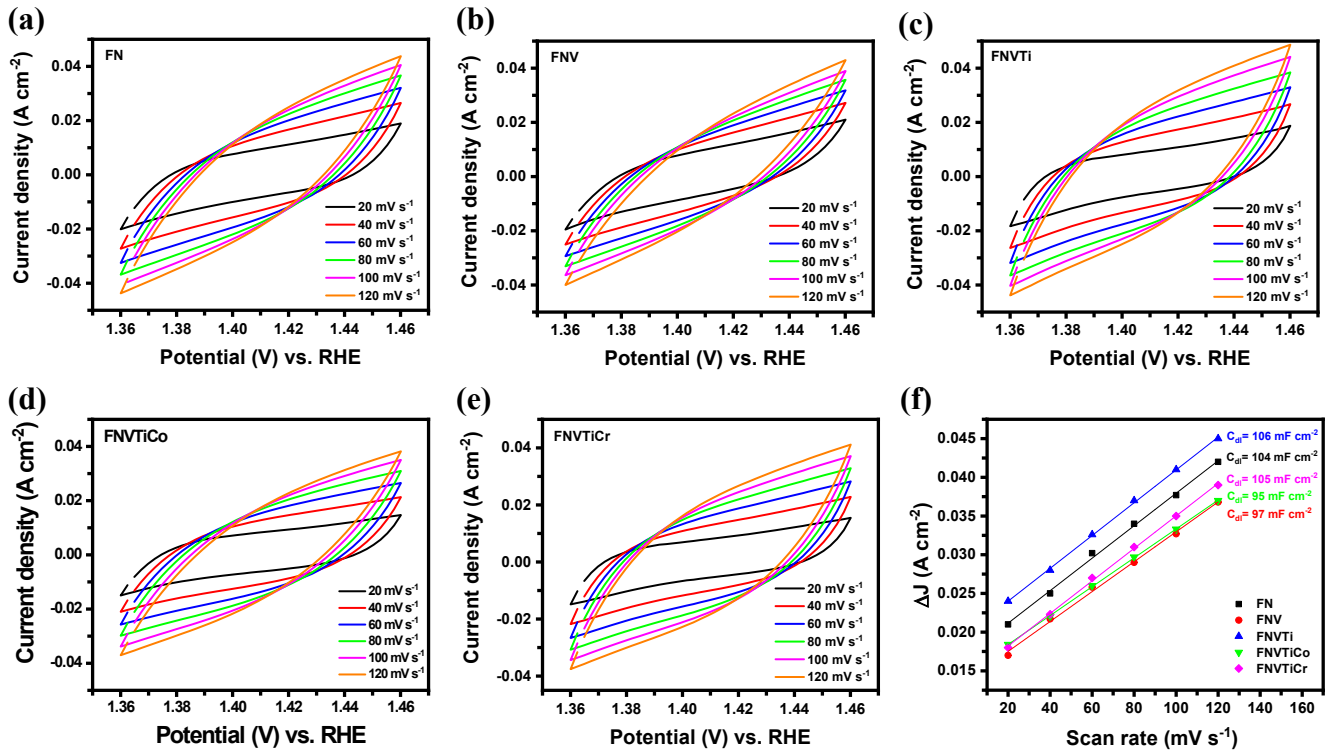

Figure S7. CV curves of (a) FN, (b) FNV, (c) FNVTi, (d) FNVTiCo, and (e) FNVTiCr. (f) The resulting  $C_{dl}$  plots.

Table S3. ECSAs and ECSA normalized overpotentials ( $\eta_{ECSA}$ ) of the obtained hydroxides.

| Sample  | ECSA (cm <sup>2</sup> ) | $\eta_{ECSA}$ (mV) at 0.1 mA cm <sup>-2</sup> |
|---------|-------------------------|-----------------------------------------------|
| FN      | 2,600                   | 309                                           |
| FNV     | 2,425                   | 293                                           |
| FNVTi   | 2,650                   | 273                                           |
| FNVTiCo | 2,375                   | 282                                           |
| FNVTiCr | 2,625                   | 251                                           |

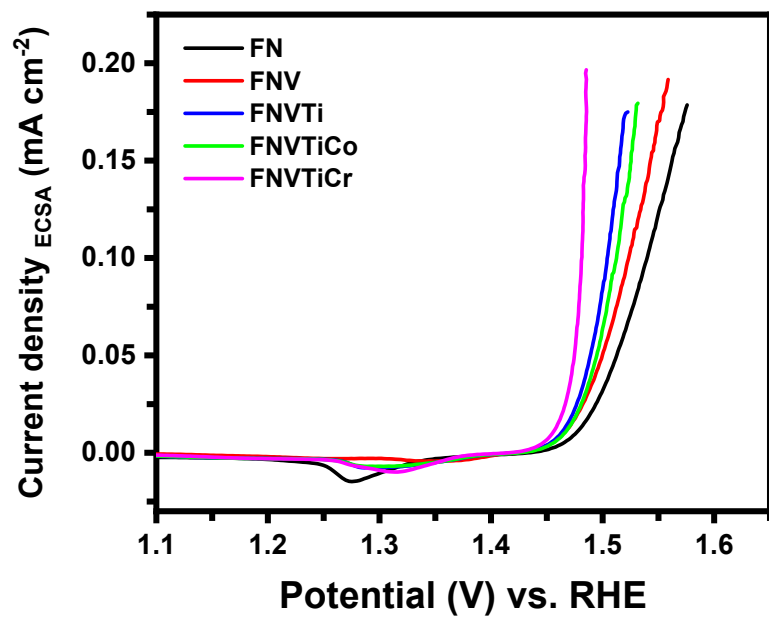

Figure S8. LSV curves normalized to the ECSA.

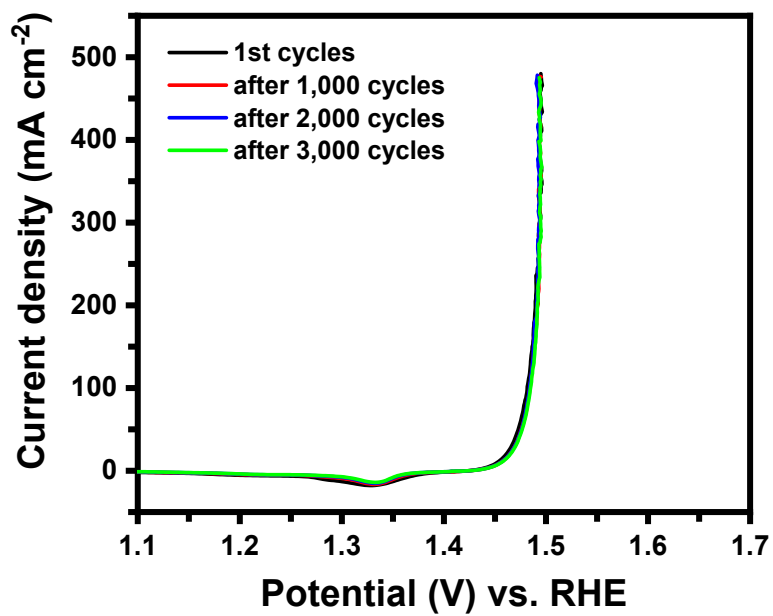

Figure S9. LSV curves of the FNVTiCr obtained after CV cycle stability.

Table S4. The comparison of the FNVCrTi hydroxide with reported NiFe-based electrocatalyst.

| Catalyst                                            | Fabrication                                                                                 | Substrate     | $\eta_{100}$<br>(mV) | Tafel slope<br>(mV dec <sup>-1</sup> ) | Stability<br>(h) | Refs.     |
|-----------------------------------------------------|---------------------------------------------------------------------------------------------|---------------|----------------------|----------------------------------------|------------------|-----------|
| NiFe LDH/NiTe                                       | Two step hydrothermal                                                                       | Ni foam       | 270                  | 51.04                                  | 30               | 5         |
| P-FeNiO/CNS                                         | Polymerization and thermal annealing under the N <sub>2</sub> , followed by phosphorization | Glassy carbon | 300                  | 52.2                                   | 20               | 6         |
| G-Ni <sub>0.5</sub> Fe <sub>0.5</sub>               | Two-step sol-gel and carbothermal                                                           | Glassy carbon | 410                  | 43                                     | 10               | 7         |
| hcp-NiFe@NC                                         | Two-step solvothermal and annealing                                                         | Carbon cloth  | 263                  | 41                                     | 35               | 8         |
| Ni <sub>x</sub> Fe <sub>1-x</sub> -AHNAs            | Chemical deposition method with the assistance of uniform magnetic field                    | Ni foam       | 230                  | 34.7                                   | 120              | 9         |
| Fe-enriched Ni(Fe)O <sub>x</sub> H <sub>y</sub>     | Electrodeposition followed by molten salt method                                            | Ni foam       | 250                  | 31                                     | 50               | 10        |
| Fe <sub>x</sub> Ni <sub>1-x</sub> alloy fiber paper | Chemical deposition and annealing                                                           | fiber paper   | 287                  | 67                                     | 80               | 11        |
| FeOOH-NiOOH                                         | Corrosion reaction method                                                                   | Ni foam       | 260                  | 38                                     | -                | 12        |
| FeNi <sub>3</sub> and NiCu alloys                   | Solvothermal followed by two-step annealing                                                 | Ni foam       | 250                  | 34                                     | 200              | 13        |
| MoFe: Ni(OH) <sub>2</sub> /NiOOH                    | Hydrothermal                                                                                | Ni foam       | 280                  | 47                                     | 50               | 14        |
| FeNiCoCrMn-high entropy glycerate (HEG)             | Solvothermal                                                                                | Ni foam       | 270                  | 40                                     | 36               | 15        |
| FeNiCoCrMnS <sub>2</sub>                            | Two-step solvothermal                                                                       | Ni foam       | 246                  | 39.1                                   | 55               | 16        |
| CrMnFeCoNiTi Zn HEG                                 | Solvothermal                                                                                | Ni foam       | 260                  | 42.3                                   | 60               | 17        |
| MgFeCoNi Cu(O) <sub>2</sub> spinel oxide            | Co-precipitation and annealing                                                              | Ni foam       | 350                  | 40                                     | 25               | 18        |
| FeCoNiMn (oxy)hydroxide                             | Electrodeposition                                                                           | Ni foam       | 290                  | 69                                     | 200              | 19        |
| FNVTiCr hydroxide                                   | Room temperature corrosion reaction method                                                  | Ni foam       | 240                  | 29                                     | 70               | This work |

Table S5. Ni 2p spectra analysis.

| Sample ID | Ni <sup>2+</sup> (%) | Ni <sup>3+</sup> (%) |
|-----------|----------------------|----------------------|
| FN        | 78.3                 | 21.7                 |
| FNV       | 74.5                 | 25.5                 |
| FNVTi     | 72.4                 | 27.6                 |
| FNVTiCo   | 73.1                 | 26.9                 |
| FNVTiCr   | 70.4                 | 29.6                 |



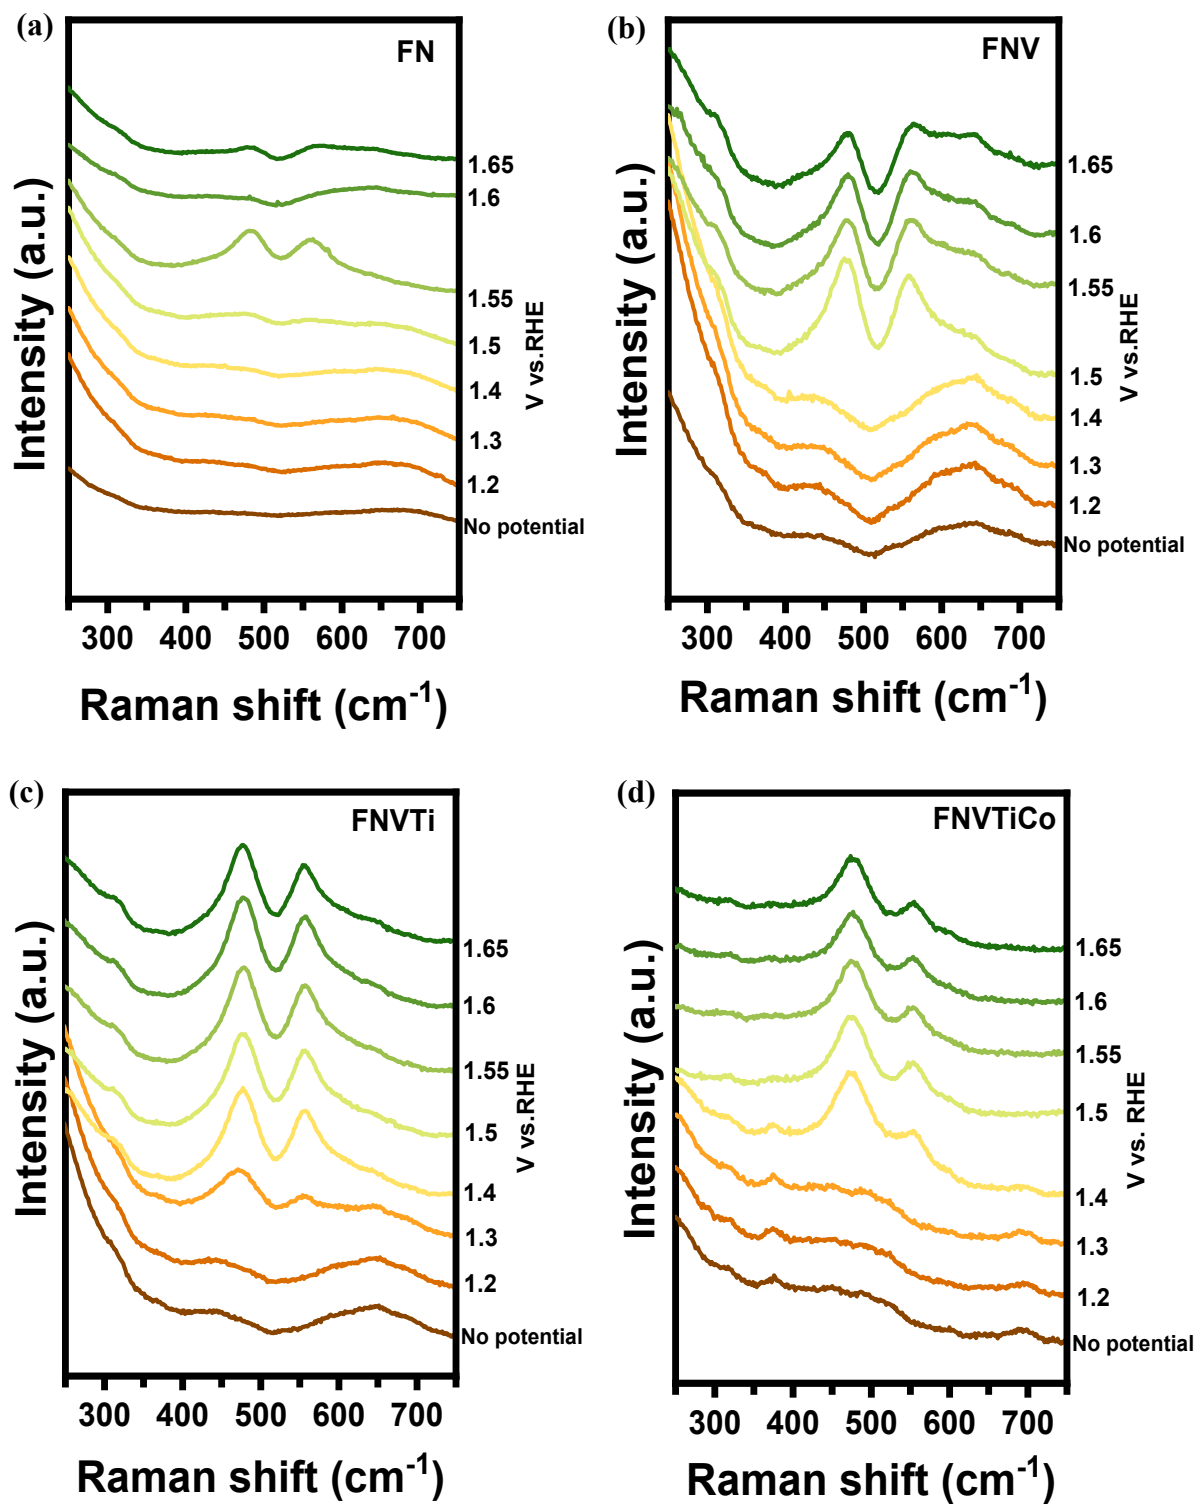

Figure S10. *In-situ* Raman spectra of hydroxides. (a) FN, (b) FNV, (c) FNVTi, and (d) FNVTiCo.

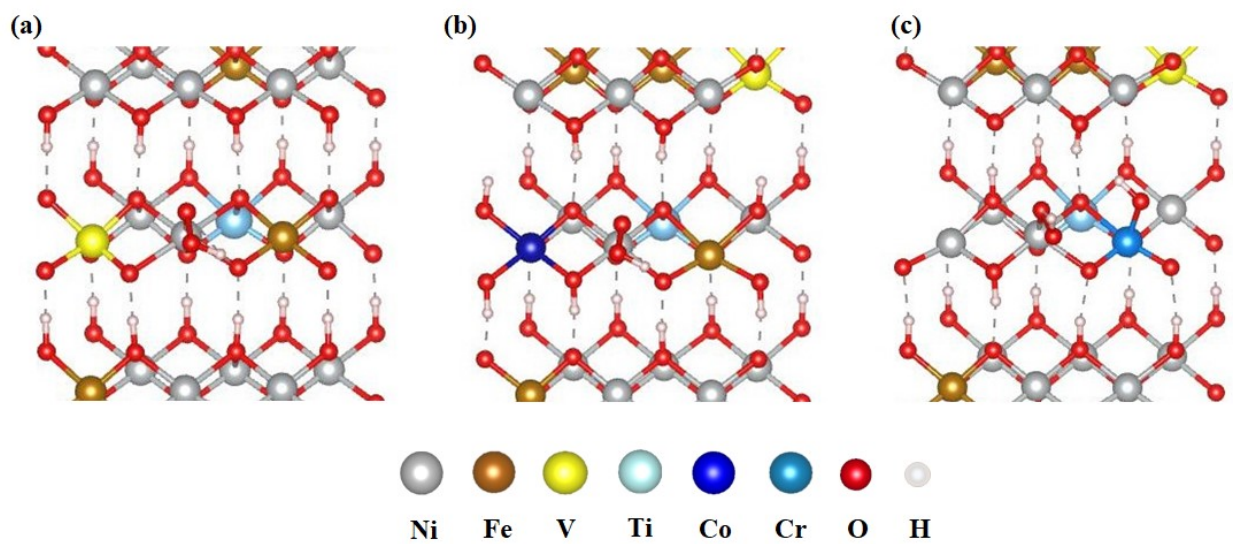

Figure S11. The top-view of optimized structure of hydroxide containing  $*\text{OOH}$  intermediates: (a) FNVTi, (b) FNVTiCo, and (c) FNVTiCr.

#### Information SIV. Determination of the rate determining step (RDS).

The energy change ( $\Delta E$ ) of each OER step in FNVTi, FNVTiCo, and FNVTiCr was calculated to determine the RDS. The RDS is the one having the highest reaction energy during OER. It is seen that from Figure SIII and Table S6 that step 4 is the RDS.

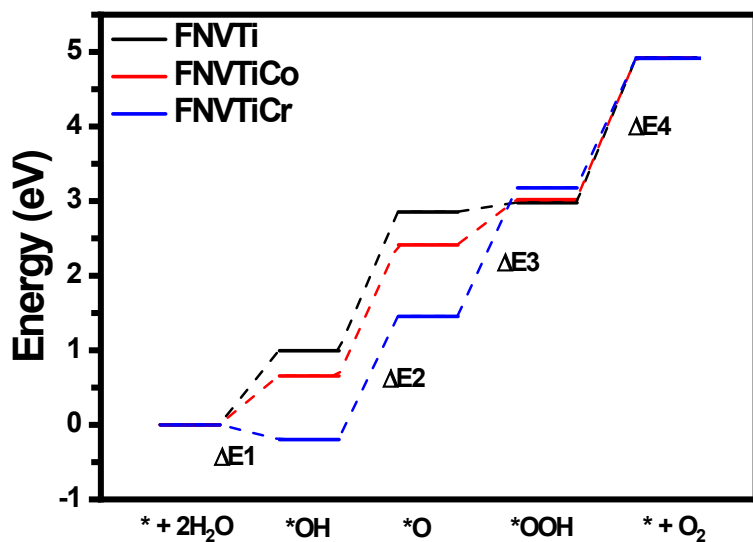

Figure SIII. OER cumulative energy diagram for the four reaction steps in OER.

Table S6. The  $\Delta E$  (eV) of the four reaction steps in OER.

| OER reactions                                          | FNVTi | FNVTiCo | FNVTiCr |
|--------------------------------------------------------|-------|---------|---------|
| Step 1: $OH^- + * \rightarrow *OH + e^-$               | 0.99  | 0.66    | -0.20   |
| Step 2: $OH^- + *OH \rightarrow *O + H_2(l) + e^-$     | 1.86  | 1.75    | 1.65    |
| Step 3: $OH^- + *O \rightarrow *OOH + e^-$             | 0.13  | 0.61    | 1.73    |
| Step 4: $OH^- + *OOH \rightarrow *O_2(g) + H_2O + e^-$ | 1.94  | 1.90    | 1.74    |

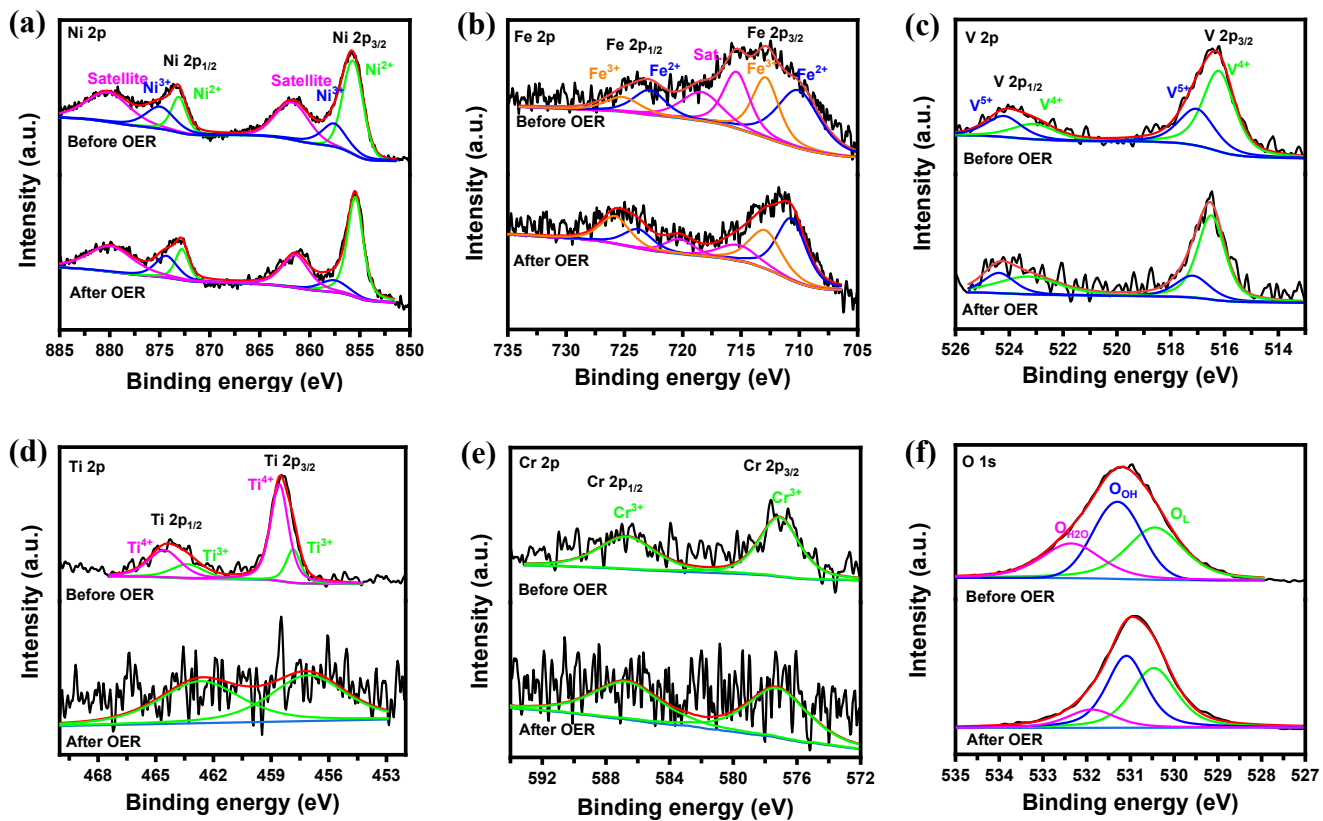

Figure S12. High resolution XPS spectra of FNVTiCr before and after OER. (a) Ni 2p, (b) Fe 2p, (c) V 2p, (d) Ti 2p, (e) Cr 2p, and (f) O 1s.

Table S7. Comparison of the overall water splitting Pt/C//FNVCrTi hydroxide cell and other reported electrolyzer have Pt/C cathode.

| Cathode//Anode Catalyst                                                                   | V <sub>10</sub> (V) | Stability (h) | Refs.     |
|-------------------------------------------------------------------------------------------|---------------------|---------------|-----------|
| Pt/C//FNVTiCr hydroxide                                                                   | 1.49                | 100           | This work |
| Pt/C-Fe <sub>0.4</sub> Ni <sub>0.6</sub> alloy//Fe <sub>0.4</sub> Ni <sub>0.6</sub> alloy | 1.50                | 30            | 11        |
| Pt/C//F(V)OOH-1.5                                                                         | 1.51                | 25            | 20        |
| Pt/C//Ni <sub>3</sub> S <sub>4</sub>                                                      | 1.51                | 30            | 21        |
| Pt/C /FeCoNi                                                                              | 1.52                | 30            | 22        |
| Pt/C//(Ni,Fe)S <sub>2</sub> /NiFe-CNFs                                                    | 1.54                | 48            | 23        |
| Pt mesh//FeNi-NFF                                                                         | 1.54                | -             | 24        |
| Pt/C//FeNiS                                                                               | 1.54                | 16            | 25        |
| Pt-C//CoFe <sub>2</sub> O <sub>4</sub>                                                    | 1.56                | 17            | 26        |
| Pt/C// core-shell Co@NC                                                                   | 1.59                | 350           | 27        |
| Pt foil//N-NPO/CC                                                                         | 1.6                 | 2.8           | 28        |

## References

1. Y. Liang, Y. Li, H. Wang, J. Zhou, J. Wang, T. Regier and H. Dai, *Nat. Mater.*, 2011, **10**, 780-786.
2. A. R. Jadhav, A. Kumar, J. Lee, T. Yang, S. Na, J. Lee, Y. Luo, X. Liu, Y. Hwang, Y. Liu and H. Lee, *J. Mater. Chem. A*, 2020, **8**, 24501-24514.
3. S. Hao, L. Chen, C. Yu, B. Yang, Z. Li, Y. Hou, L. Lei and X. Zhang, *ACS Energy Lett.*, 2019, **4**, 952-959.
4. X. Li, C. Liu, Z. Fang, L. Xu, C. Lu and W. Hou, *Small*, 2022, **18**, 2104354.
5. L. Hu, X. Zeng, X. Wei, H. Wang, Y. Wu, W. Gu, L. Shi and C. Zhu, *Appl. Catal. B Environ.*, 2020, **273**, 119014.
6. Z. Liu, B. Tang, X. Gu, H. Liu and L. Feng, *Chem. Eng. J.*, 2020, **395**, 125170.
7. H. Khani, N. S. Grundish, D. O. Wipf and J. B. Goodenough, *Adv. Energy Mater.*, 2020, **10**, 1903215.
8. C. Wang, H. Yang, Y. Zhang and Q. Wang, *Angew. Chem. Int. Ed.*, 2019, **58**, 6099-6103.
9. C. Liang, P. Zou, A. Nairan, Y. Zhang, J. Liu, K. Liu, S. Hu, F. Kang, H. J. Fan and C. Yang, *Energy Environ. Sci.*, 2020, **13**, 86-95.
10. Q. Xu, H. Jiang, X. Duan, Z. Jiang, Y. Hu, S. W. Boettcher, W. Zhang, S. Guo and C. Li, *Nano Lett.*, 2021, **21**, 492-499.
11. G. Zhang, J. Zeng, J. Yin, C. Zuo, P. Wen, H. Chen and Y. Qiu, *Appl. Catal. B Environ.*, 2021, **286**, 119902.
12. L. Bai, S. Lee and X. Hu, *Angew. Chem. Int. Ed.*, 2021, **60**, 3095-3103.

13. B. Wang, K. Zhao, Z. Yu, C. Sun, Z. Wang, N. Feng, L. Mai, Y. Wang and Y. Xia, *Energy Environ. Sci.*, 2020, **13**, 2200-2208.
14. Y. Jin, S. Huang, X. Yue, H. Du and P. K. Shen, *ACS Catal.*, 2018, **8**, 2359-2363.
15. T. X. Nguyen, Y.-H. Su, C.-C. Lin, J. Ruan and J.-M. Ting, *Adv. Sci.*, 2021, **8**, 2002446.
16. T. X. Nguyen, Y.-H. Su, C.-C. Lin and J.-M. Ting, *Adv. Funct. Mater.*, 2021, **31**, 2106229.
17. N.-H. Ting, T. X. Nguyen, C.-H. Lee, Y.-C. Chen, C.-H. Yeh, H.-Y. T. Chen and J.-M. Ting, *Appl. Mater. Today*, 2022, **27**, 101398.
18. T. X. Nguyen, Z.-T. Huang and J.-M. Ting, *Appl. Surf. Sci.*, 2021, **570**, 151160.
19. L. He, N. Wang, B. Sun, L. Zhong, M. Yao, W. Hu and S. Komarneni, *J. Clean. Prod.*, 2022, **356**, 131680.
20. F. N. I. Sari, H.-S. Chen, A. k. Anbalagan, Y.-J. Huang, S.-C. Haw, J.-M. Chen, C.-H. Lee, Y.-H. Su and J.-M. Ting, *Chem. Eng. J.*, 2022, **438**, 135515.
21. K. Wan, J. Luo, C. Zhou, T. Zhang, J. Arbiol, X. Lu, B.-W. Mao, X. Zhang and J. Fransaer, *Adv. Funct. Mater.*, 2019, **29**, 1900315.
22. S. Yan, M. Zhong, C. Wang and X. Lu, *Chem. Eng. J.*, 2022, **430**, 132955.
23. M. Zhong, N. Song, C. Li, C. Wang, W. Chen and X. Lu, *J. Colloid Interface Sci.*, 2022, **614**, 556-565.
24. C. Cao, D.-D. Ma, Q. Xu, X.-T. Wu and Q.-L. Zhu, *Adv. Funct. Mater.*, 2019, **29**, 1807418.
25. C. Zhao, C. Zhang, S. Bhojate, P. K. Kahol, N. Kostoglou, C. Mitterer, S. Hinder, M. Baker, G. Constantinides, K. Polychronopoulou, C. Rebholz and R. K. Gupta, *Catalysts*, 2019, **9**, 597.

26. C. Zhang, S. Bhoyate, C. Zhao, P. K. Kahol, N. Kostoglou, C. Mitterer, S. J. Hinder, M. A. Baker, G. Constantinides, K. Polychronopoulou, C. Rebholz and R. K. Gupta, *Catalysts*, 2019, **9**, 176.
27. A. Sivanantham, P. Ganesan, L. Estevez, B. P. McGrail, R. K. Motkuri and S. Shanmugam, *Adv. Energy Mater.*, 2018, **8**, 1702838.
28. J. Huang, Y. Sun, Y. Zhang, G. Zou, C. Yan, S. Cong, T. Lei, X. Dai, J. Guo, R. Lu, Y. Li and J. Xiong, *Adv. Mater.*, 2018, **30**, 1705045.
